# Supplementary material for: National Agricultural Innovation System (NAIS): Diagnosis, Gaps, and Mapping of Actors
Source: MDPI journal article supplement (doi:10.3390/su16083294), 2024-04-15
Supplement: s1 [file s1]

**Table S2.** Gaps in user classification by municipality

| MUNICIPALITY           | TECHNICAL<br>ASSISTANCE | ASSOCIATIVITY | TI          | ENVIRONMENT<br>AL | PUBLIC<br>POLICY |
|------------------------|-------------------------|---------------|-------------|-------------------|------------------|
| SAN JUAN<br>NEPOMUCENO | 1,445844905             | 2,168874172   | 1,454746137 | 1,311258278       | 1,390728477      |
| SANTA ROSA DEL<br>SUR  | 1,825591398             | 2,043333333   | 1,728888889 | 1,855555556       | 2,252380952      |
| JURADÓ                 | 1,52660243              | 2,214285714   | 1,536796537 | 1,443181818       | 2,305194805      |
| SAN JOSÉ DEL<br>PALMAR | 1,45655914              | 1,533333333   | 1,26        | 1,356666667       | 1,366666667      |
| CABUYARO               | 2,129462366             | 1,94          | 2,12        | 1,851666667       | 2,31047619       |
| VISTAHERMOSA           | 1,549677419             | 1,916666667   | 1,345555556 | 1,441666667       | 1,86             |
| CHAPARRAL              | 1,635913978             | 2,013333333   | 1,551111111 | 1,477222222       | 1,885714286      |
| ROVIRA                 | 1,841505376             | 2,276666667   | 1,897777778 | 1,166666667       | 2,402857143      |

**Source:** Own elaboration
