# Supplementary material for: National Agricultural Innovation System (NAIS): Diagnosis, Gaps, and Mapping of Actors
Source: MDPI journal article supplement (doi:10.3390/su16083294), 2024-04-15
Supplement: s1 [file s1]

**Table S6.** Gaps in the relationships between the actors of the National Science, Technology, and Innovation System in the field of agriculture: findings from the weighting matrix

| <i>1. Collaboration Articles scientific articles</i>                               |            |                                                                     |                                                                                  |                      |                                                |  |
|------------------------------------------------------------------------------------|------------|---------------------------------------------------------------------|----------------------------------------------------------------------------------|----------------------|------------------------------------------------|--|
| Department                                                                         | Population | No. Articlesco-authorship                                           | No. Articles in.Co-authorship Co-authorship about population.                    | Score max.Score max. | Score Co-authorships articles                  |  |
| Tolima                                                                             | 1.339.998  | 20                                                                  | 0,00001493                                                                       | 5                    | 5,00                                           |  |
| Meta                                                                               | 1.053.871  | 14                                                                  | 0,00001328                                                                       | 5                    | 4,45                                           |  |
| Bolívar                                                                            | 2.130.000  | 5                                                                   | 0,00000235                                                                       | 5                    | 0,79                                           |  |
| Chocó                                                                              | 549.225    | 2                                                                   | 0,00000364                                                                       | 5                    | 1,22                                           |  |
| <i>2. Collaboration Patents</i>                                                    |            |                                                                     |                                                                                  |                      |                                                |  |
| Department                                                                         | Population | No. Patents collaboration n                                         | No. Patents in Collaboration with the Population                                 | Score max.Score max. | Score patents in collaboration                 |  |
| Tolima                                                                             | 1.339.998  | 0                                                                   | 0,00000000                                                                       | 5                    | 0,00                                           |  |
| Meta                                                                               | 1.053.871  | 0                                                                   | 0,00000000                                                                       | 5                    | 0,00                                           |  |
| Bolívar                                                                            | 2.130.000  | 0                                                                   | 0,00000000                                                                       | 5                    | 0,00                                           |  |
| Chocó                                                                              | 549.225    | 0                                                                   | 0,00000000                                                                       | 5                    | 0,00                                           |  |
| <i>3. Profiles of projects enrolled 2020 Agency of Development Rural</i>           |            |                                                                     |                                                                                  |                      |                                                |  |
| Department                                                                         | Population | No. Profiles of projects enrolled >2020 Agency of Development Rural | No. Profiles of projects registered. 2020 Agency de Development about population | Score max.Score max. | Score profiles of projects registered projects |  |
| Tolima                                                                             | 1.339.998  | 24                                                                  | 0,00001791                                                                       | 5                    | 5,00                                           |  |
| Meta                                                                               | 1.053.871  | 12                                                                  | 0,00001139                                                                       | 5                    | 3,18                                           |  |
| Bolívar                                                                            | 2.130.000  | 10                                                                  | 0,00000469                                                                       | 5                    | 1,31                                           |  |
| Chocó                                                                              | 549.225    | 8                                                                   | 0,00001457                                                                       | 5                    | 4,07                                           |  |
| <i>4. Resources from financing SGR Fund from Agriculture and Development Rural</i> |            |                                                                     |                                                                                  |                      |                                                |  |
| Resources                                                                          |            |                                                                     |                                                                                  |                      |                                                |  |
| Department                                                                         | Population | deFinancing SGR Funding from Agriculture and rural development      | Resources of SGR financing Funding from and Rural population                     | Score max.Score max. | Score profiles of projects registered projects |  |
| Tolima                                                                             | 1.339.998  | \$61.110.810.603                                                    | \$45.605                                                                         | 5                    | 0,53                                           |  |
| Meta                                                                               | 1.053.871  | \$180.529.116.126                                                   | \$171.301                                                                        | 5                    | 1,98                                           |  |
| Bolívar                                                                            | 2.130.000  | \$115.850.589.338                                                   | \$54.390                                                                         | 5                    | 0,63                                           |  |
| Chocó                                                                              | 549.225    | \$238.007.380.716                                                   | \$433.351                                                                        | 5                    | 5,00                                           |  |

5. *Resources obtained from the CTeI Fund of the SGR by the Department*

| Department | Population | Recursos obtenidos del Fondo de CTeI del SGR por Departamento | Recursos obtenidos del Fondo de CTeI del SGR por Overpopulation | Score max.Score max. | Score profiles of projects registered projects |
|------------|------------|---------------------------------------------------------------|-----------------------------------------------------------------|----------------------|------------------------------------------------|
| Tolima     | 1.339.998  | \$130.268.736.977                                             | \$97.216                                                        | 5                    | 1,32                                           |
| Meta       | 1.053.871  | \$48.500.999.471                                              | \$46.022                                                        | 5                    | 0,62                                           |
| Bolívar    | 2.130.000  | \$301.768.778.749                                             | \$141.675                                                       | 5                    | 1,92                                           |
| Chocó      | 549.225    | \$202.385.840.265                                             | \$368.493                                                       | 5                    | 5,00                                           |

6. *Agricultural and related associations, cooperatives, foundations*

| Department | Population | Asociaciones, cooperativas y fundaciones agrícolas | Asociaciones, cooperativas y fundaciones agrícolas about population. | Score max.Score max. | Puntaje Asociaciones, cooperativas y fundaciones agrícolas |
|------------|------------|----------------------------------------------------|----------------------------------------------------------------------|----------------------|------------------------------------------------------------|
| Tolima     | 1.339.998  | 242                                                | 0,0001806                                                            | 5                    | 3,24                                                       |
| Meta       | 1.053.871  | 294                                                | 0,0002790                                                            | 5                    | 5,00                                                       |
| Bolívar    | 2.130.000  | 153                                                | 0,0000718                                                            | 5                    | 1,29                                                       |
| Chocó      | 549.225    | 51                                                 | 0,0000929                                                            | 5                    | 1,66                                                       |

7. *Agricultural and related cluster initiatives*

| Department | Population | Iniciativas Clúster (agrícolas y afines) | Iniciativas Clúster (agrícolas y afines) sobre población | Score max.Score max. | Puntaje iniciativas Clúster (agrícolas y afines) |
|------------|------------|------------------------------------------|----------------------------------------------------------|----------------------|--------------------------------------------------|
| Tolima     | 1.339.998  | 2                                        | 0,0000015                                                | 5                    | 3,93                                             |
| Meta       | 1.053.871  | 2                                        | 0,0000019                                                | 5                    | 5,00                                             |
| Bolívar    | 2.130.000  | 2                                        | 0,0000009                                                | 5                    | 2,47                                             |
| Chocó      | 549.225    | 0                                        | 0,0000000                                                | 5                    | 0,00                                             |

8. *Cabildos and Indigenous reserves*

| Department | Population | Cabildos and Indigenous reserves | Cabildos and Indigenous reserves about population. | Score max.Score max. | Score Cabildos and Indigenous reserves |
|------------|------------|----------------------------------|----------------------------------------------------|----------------------|----------------------------------------|
| Tolima     | 1.339.998  | 82                               | 0,0000612                                          | 5                    | 1,21                                   |
| Meta       | 1.053.871  | 20                               | 0,0000190                                          | 5                    | 0,37                                   |
| Bolívar    | 2.130.000  | 10                               | 0,0000047                                          | 5                    | 0,09                                   |
| Chocó      | 549.225    | 139                              | 0,0002531                                          | 5                    | 5,00                                   |

9. *No. Research groups in agriculture and related areas*

| Department | Population | No. Grupos de Investigación en agricultura | No. Grupos de Investigación en agricultura y afines about population. | Score max.Score max. | Score No. Grupos de Investigación en agricultura y afines |
|------------|------------|--------------------------------------------|-----------------------------------------------------------------------|----------------------|-----------------------------------------------------------|
|------------|------------|--------------------------------------------|-----------------------------------------------------------------------|----------------------|-----------------------------------------------------------|

y afines

|         |           |    |           |   |      |
|---------|-----------|----|-----------|---|------|
| Tolima  | 1.339.998 | 8  | 0,0000060 | 5 | 3,15 |
| Meta    | 1.053.871 | 10 | 0,0000095 | 5 | 5,00 |
| Bolívar | 2.130.000 | 0  | 0,0000000 | 5 | 0,00 |
| Chocó   | 549.225   | 2  | 0,0000036 | 5 | 1,92 |

**10. Technoparks**

| Department | Population | No. Technoparks. | No. Technoparks. about population. | Score max.Score max. | Score Technoparks |
|------------|------------|------------------|------------------------------------|----------------------|-------------------|
| Tolima     | 1.339.998  | 1                | 0,0000007                          | 5                    | 5,00              |
| Meta       | 1.053.871  | 0                | 0,0000000                          | 5                    | 0,00              |
| Bolívar    | 2.130.000  | 0                | 0,0000000                          | 5                    | 0,00              |
| Chocó      | 549.225    | 0                | 0,0000000                          | 5                    | 0,00              |

**11. Offices of Transfer Technological and Results of Research OTRIS**

| Department | Population | Offices from Transfer Technological OTRIS | Offices of Transfer Technology OTRIS about population. | Score max.Score max. | Score Offices de Transfer Technological OTRIS |
|------------|------------|-------------------------------------------|--------------------------------------------------------|----------------------|-----------------------------------------------|
| Tolima     | 1.339.998  | 0                                         | 0,0000000                                              | 5                    | 0,00                                          |
| Meta       | 1.053.871  | 0                                         | 0,0000000                                              | 5                    | 0,00                                          |
| Bolívar    | 2.130.000  | 0                                         | 0,0000000                                              | 5                    | 0,00                                          |
| Chocó      | 549.225    | 0                                         | 0,0000000                                              | 5                    | 0,00                                          |

**Results variable assessment of relationship System National of CTeI on Agriculture and related**

| Department | Weightingaverage |
|------------|------------------|
| Tolima     | 2,58             |
| Meta       | 2,33             |
| Chocó      | 2,17             |
| Bolívar    | 0,77             |

Source: Own Source
