# Supplementary material for: National Agricultural Innovation System (NAIS): Diagnosis, Gaps, and Mapping of Actors
Source: MDPI journal article supplement (doi:10.3390/su16083294), 2024-04-15
Supplement: s1 [file s1]

**Table S3. NAIS grids grouped by municipality**

| MUNICIPALITY        | EXTENSION   | I+D         | TRAINING    | SUSTAINABILITY | INNOVATION<br>AND ICTs |
|---------------------|-------------|-------------|-------------|----------------|------------------------|
| BOLÍVAR             |             |             |             |                |                        |
| SAN JUAN NEPOMUCENO | 1,189042745 | 1,498896247 | 1,448675497 | 1,700662252    | 1,221192053            |
| SANTA ROSA DEL SUR  | 2,076363636 | 1,9         | 1,463333333 | 2,107333333    | 1,476                  |
| CHOCÓ               |             |             |             |                |                        |
| JURADÓ              | 1,989964581 | 1,649350649 | 1,998376623 | 1,792207792    | 1,161038961            |
| SAN JOSÉ DEL PALMAR | 1,131515152 | 1,254074074 | 1,275       | 1,566666667    | 1,078666667            |
| TOLIMA              |             |             |             |                |                        |
| CABUYARO            | 2,209090909 | 2,221481481 | 2,231666667 | 2,148          | 1,785333333            |
| VISTAHERMOSA        | 1,38969697  | 1,400740741 | 1,698333333 | 1,702          | 1,225333333            |
| META                |             |             |             |                |                        |
| CHAPARRAL           | 1,704848485 | 1,551111111 | 1,55        | 1,655333333    | 1,333333333            |
| ROVIRA              | 2,025454545 | 1,991851852 | 2,041666667 | 1,994666667    | 1,366666667            |

**Source:** Own elaboration
