# Supplementary material for: National Agricultural Innovation System (NAIS): Diagnosis, Gaps, and Mapping of Actors
Source: MDPI journal article supplement (doi:10.3390/su16083294), 2024-04-15
Supplement: s1 [file s1]

**Table S4.** Gaps per question by department.

| MUNICIPALITY | P 23     | P24      | P25      | P26      | P27      | P28      | P29      | P30      |
|--------------|----------|----------|----------|----------|----------|----------|----------|----------|
| NATIONAL     | 1,312863 | 1,637344 | 2,145228 | 2,701245 | 2,715353 | 2,053112 | 1,629876 | 1,636515 |
| BOLÍVAR      | 1,395349 | 1,664452 | 1,903654 | 2,408638 | 2,817276 | 2,431894 | 1,408638 | 1,604651 |
| CHOCÓ        | 1,009868 | 1,174342 | 2,082237 | 2,144737 | 2,746711 | 1,565789 | 1,391447 | 1,401316 |
| META         | 1,21     | 1,816667 | 2,2      | 2,983333 | 2,646667 | 2,06     | 1,916667 | 1,83     |
| TOLIMA       | 1,64     | 1,9      | 2,396667 | 3,276667 | 2,65     | 2,16     | 1,806667 | 1,713333 |
|              | P31      | P32      | P33      | P34      | P35      | P36      | P37      | P38      |
| NATIONAL     | 1,568465 | 2,020747 | 1,747718 | 1,73029  | 1,870539 | 1,745228 | 1,848133 | 1,808299 |
| BOLÍVAR      | 1,44186  | 1,860465 | 1,54485  | 1,531561 | 1,647841 | 1,724252 | 1,564784 | 2,179402 |
| CHOCÓ        | 1,552632 | 2,332237 | 1,901316 | 1,582237 | 1,851974 | 1,161184 | 1,769737 | 1,309211 |
| META         | 1,673333 | 2,11     | 1,773333 | 1,983333 | 1,906667 | 1,863333 | 2,203333 | 1,813333 |
| TOLIMA       | 1,606667 | 1,776667 | 1,77     | 1,826667 | 2,076667 | 2,24     | 1,856667 | 1,936667 |
|              | P39      | P40      | P41      | P42      | P43      | P44      | P45      | P46      |
| NATIONAL     | 1,777593 | 1,908714 | 1,712863 | 2,024066 | 1,321162 | 1,302075 | 1,612448 | 1,321992 |
| BOLÍVAR      | 1,372093 | 1,684385 | 1,700997 | 1,92691  | 1,20598  | 1,189369 | 1,774086 | 1,202658 |
| CHOCÓ        | 1,789474 | 1,957237 | 1,559211 | 1,960526 | 1,026316 | 1,006579 | 1,098684 | 1,049342 |
| META         | 1,986667 | 2,12     | 1,75     | 2,09     | 1,446667 | 1,45     | 1,86     | 1,55     |
| TOLIMA       | 1,963333 | 1,873333 | 1,843333 | 2,12     | 1,61     | 1,566667 | 1,723333 | 1,49     |
|              | 47       | 48       | 49       | 50       | 51       | 52       | 53       | 54       |
| NATIONAL     | 1,907884 | 1,841494 | 1,583402 | 1,559336 | 2,082158 | 2,123651 | 1,66971  | 1,73195  |
| BOLÍVAR      | 2,046512 | 1,657807 | 1,923588 | 1,568106 | 2,604651 | 2,395349 | 1,754153 | 1,674419 |
| CHOCÓ        | 1,940789 | 1,700658 | 1,154605 | 1,279605 | 1,779605 | 2,203947 | 1,444079 | 1,615132 |
| META         | 1,943333 | 1,963333 | 1,823333 | 1,823333 | 2,173333 | 2,153333 | 1,613333 | 1,903333 |
| TOLIMA       | 1,7      | 2,046667 | 1,436667 | 1,57     | 1,773333 | 1,74     | 1,87     | 1,736667 |
|              | 55       | 56       | 57       | 58       | 59       | 60       | 61       | 62       |
| NATIONAL     | 1,627386 | 1,164315 | 1,437344 | 1,19668  | 1,242324 | 1,610788 | 2,050622 | 2,106224 |
| BOLÍVAR      | 1,332226 | 1        | 1,614618 | 1,136213 | 1,209302 | 1,780731 | 1,900332 | 2,20598  |
| CHOCÓ        | 1,424342 | 0,967105 | 1,026316 | 1,013158 | 1,055921 | 1,539474 | 2,243421 | 1,759868 |
| META         | 1,78     | 1,406667 | 1,656667 | 1,42     | 1,48     | 1,563333 | 2,07     | 2,3      |
| TOLIMA       | 1,976667 | 1,286667 | 1,456667 | 1,22     | 1,226667 | 1,56     | 1,986667 | 2,163333 |
|              | P63      | P64      | P65      | P66      | P67      | P68      | P69      | P70      |
| NATIONAL     | 2,229876 | 2,26971  | 1,40332  | 1,562656 | 1,517012 | 1,786722 | 1,19668  | 1,752697 |
| BOLÍVAR      | 2,425249 | 2,481728 | 1,428571 | 1,388704 | 1,182724 | 1,421927 | 1,026578 | 1,923588 |
| CHOCÓ        | 2,101974 | 2,328947 | 1,154605 | 1,638158 | 1,503289 | 1,950658 | 1,072368 | 1,493421 |
| META         | 2,263333 | 2,16     | 1,673333 | 1,656667 | 1,853333 | 2,056667 | 1,436667 | 1,586667 |
| TOLIMA       | 2,13     | 2,106667 | 1,36     | 1,566667 | 1,53     | 1,716667 | 1,253333 | 2,01     |
|              | P71      | P72      | P73      | P74      | P75      | P76      | P77      | P78      |
| NATIONAL     | 1,99751  | 1,379253 | 1,628216 | 1,985892 | 1,950207 | 1,502905 | 2,458921 | 1,721992 |
| BOLÍVAR      | 1,887043 | 1,096346 | 1,827243 | 1,933555 | 1,817276 | 1,518272 | 2,48505  | 1,212625 |
| CHOCÓ        | 1,914474 | 1,611842 | 1,355263 | 1,9375   | 1,944079 | 1,075658 | 2,404605 | 1,710526 |

|               |      |          |          |          |          |          |          |          |
|---------------|------|----------|----------|----------|----------|----------|----------|----------|
| <b>META</b>   | 2,09 | 1,5      | 1,763333 | 1,963333 | 2,013333 | 1,596667 | 2,793333 | 2,32     |
| <b>TOLIMA</b> | 2,1  | 1,306667 | 1,57     | 2,11     | 2,026667 | 1,826667 | 2,153333 | 1,646667 |

---

**Source:** Own elaboration
