# Supplementary material for: National Agricultural Innovation System (NAIS): Diagnosis, Gaps, and Mapping of Actors
Source: MDPI journal article supplement (doi:10.3390/su16083294), 2024-04-15
Supplement: s1 [file s1]

**Table S7. Tolima - Main gaps obtained**

| 1. TOLIMA. - Main gaps obtained                                                                                                                                                                        |                                                                                                                                                                                     |                                                                                                                                                     |                                                                                                                                                                                                                                                      |                                                                                                                                                         |
|--------------------------------------------------------------------------------------------------------------------------------------------------------------------------------------------------------|-------------------------------------------------------------------------------------------------------------------------------------------------------------------------------------|-----------------------------------------------------------------------------------------------------------------------------------------------------|------------------------------------------------------------------------------------------------------------------------------------------------------------------------------------------------------------------------------------------------------|---------------------------------------------------------------------------------------------------------------------------------------------------------|
| Extension                                                                                                                                                                                              | I+D                                                                                                                                                                                 | Sustainability                                                                                                                                      | Training<br>Projects that<br>through planning,<br>implementation,<br>financing, and<br>evaluation of<br>training and<br>qualification<br>actions directly<br>implement the<br>R&D&I process in<br>the productive<br>unit.                            | Innovation and ICTs                                                                                                                                     |
| <p>Technical assistance from a private individual/state/guild to provide agricultural extension services to their productive units.</p> <p>AVERAGE: 1.7<br/>MODE: 1</p>                                | <p>Presence of people directly involved in R&amp;D processes.</p> <p>AVERAGE: 1.2<br/>MODE: 1</p>                                                                                   | <p>Participation in the development of innovation-based sustainability.</p> <p>AVERAGE: 1.6<br/>MODE: 1</p>                                         | <p>AVERAGE: 1.5<br/>MODE: 1</p>                                                                                                                                                                                                                      | <p>People directly involved in R&amp;D&amp;I activities.</p>                                                                                            |
| <p><b>GAP:</b> Does not have technical assistance in its productive unit.</p>                                                                                                                          | <p><b>GAP:</b> Your production unit has NO people directly involved in R&amp;D&amp;I activities and in establishing strategic alliances with interest groups.</p>                   | <p><b>GAP:</b> No active participation of stakeholders in the development of sustainability based on innovation.</p>                                | <p><b>GAP:</b> No knowledge of projects related to training and capacity building.</p>                                                                                                                                                               | <p><b>GAP:</b> There are NO people directly involved in R&amp;D and innovation activities and in establishing strategic alliances with</p>              |
| <p><b>HIGHEST RATING:</b> It has technical assistance from the following three actors/agents:</p> <p>individuals/state/guilds to provide agricultural extension services to their production unit.</p> | <p><b>HIGHEST QUALIFICATION:</b><br/>The production unit has people directly involved in R&amp;D&amp;I activities and is establishing strategic alliances with interest groups.</p> | <p><b>HIGHEST RATING:</b><br/>Active stakeholder participation in the development of innovation-based sustainability is present and sufficient.</p> | <p><b>MAXIMUM QUALIFICATION:</b><br/>Knows the projects and considers that they have planned, implemented, financed, and evaluated training and capacity-building actions that directly impact the R&amp;D&amp;I process in its productive unit.</p> | <p><b>HIGHEST RATING:</b> There are people directly involved in R&amp;D&amp;I activities and establishing strategic alliances with interest groups.</p> |
